# Supplementary material for: A solid-phase approach for the synthesis of α-aminoboronic acid peptides
Source: PubMed Central journal article supplement (PMC9077542; doi:10.1039/c7ra13479g), 2018-01-16
Supplement: RA-008-C7RA13479G-s001.pdf [file RA-008-C7RA13479G-s001.pdf]

## Copies of NMR spectra

### <sup>1</sup>H NMR of compound **8**

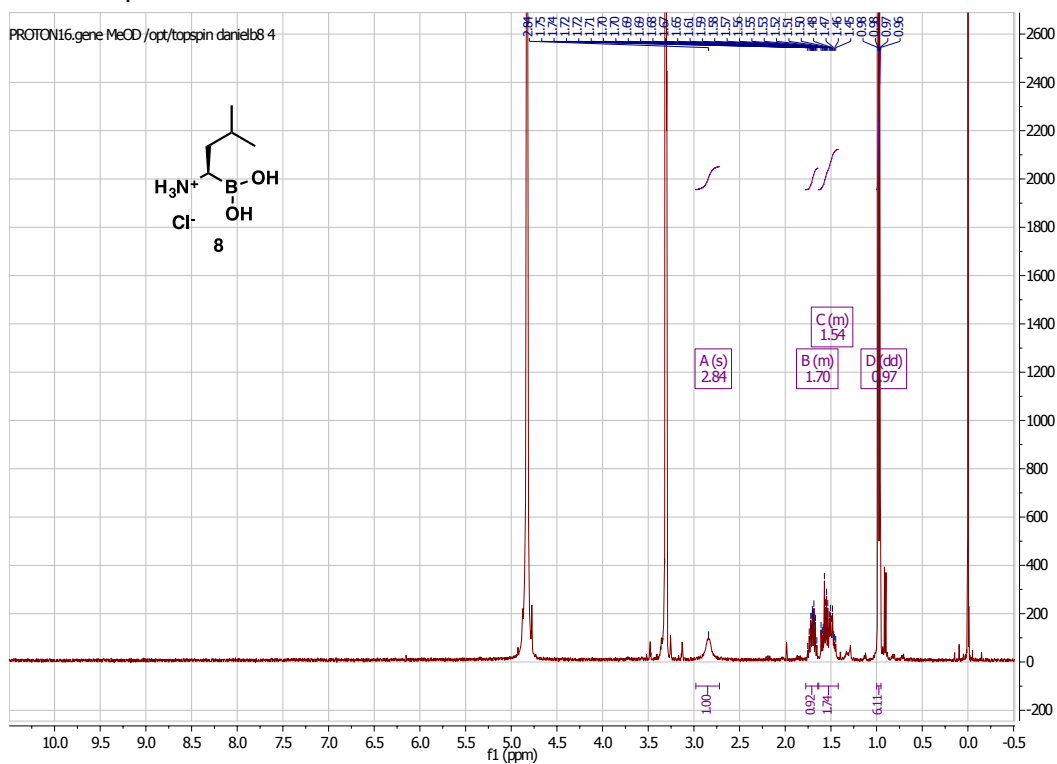

### <sup>1</sup>H NMR of Bortezomib

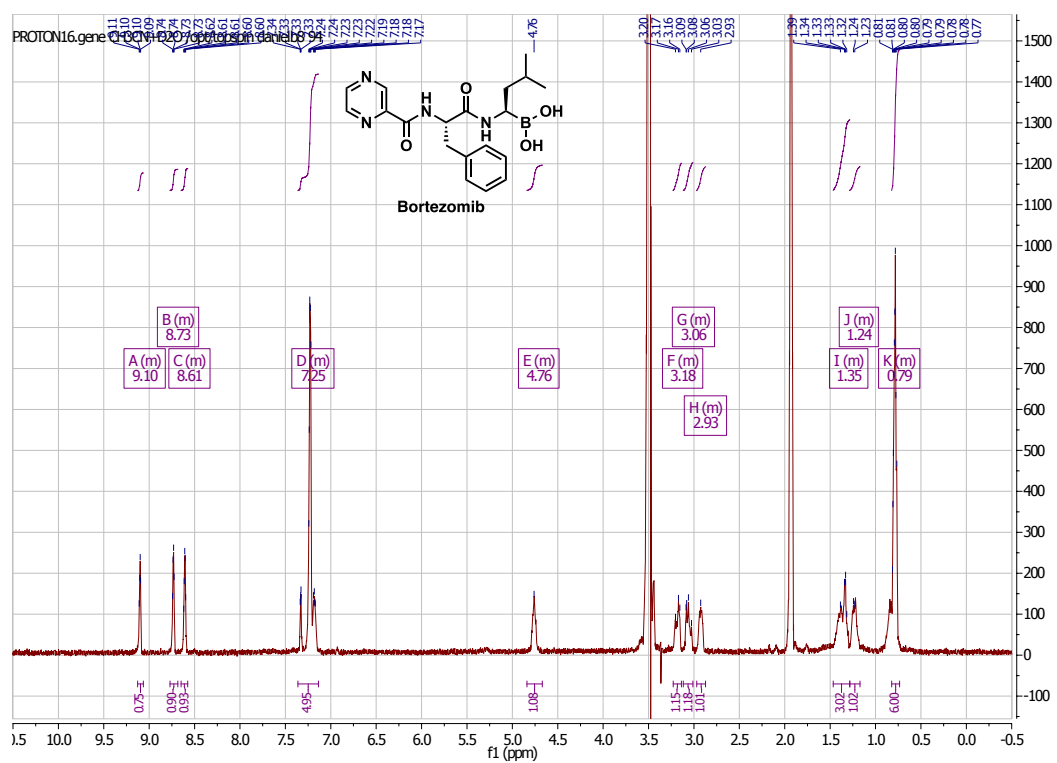

# HPLC trace of Bortezomib

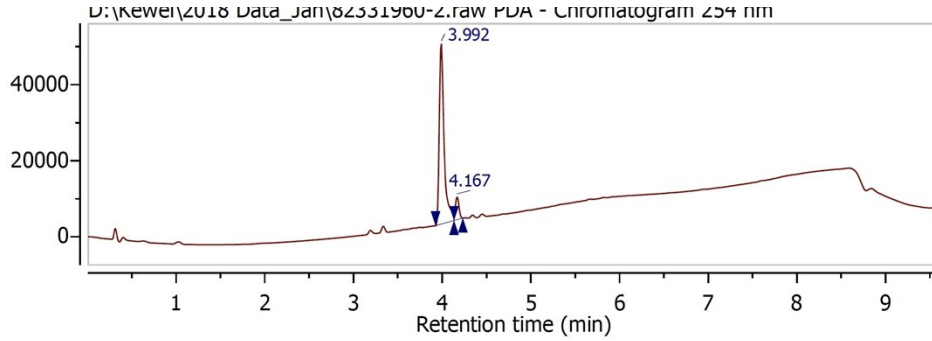

| UV 254 (>= 1%) |        |        |
|----------------|--------|--------|
| RT             | Area % | MS+    |
| 3.99           | 91.05  | 367.19 |
| 4.17           | 8.95   | 367.19 |

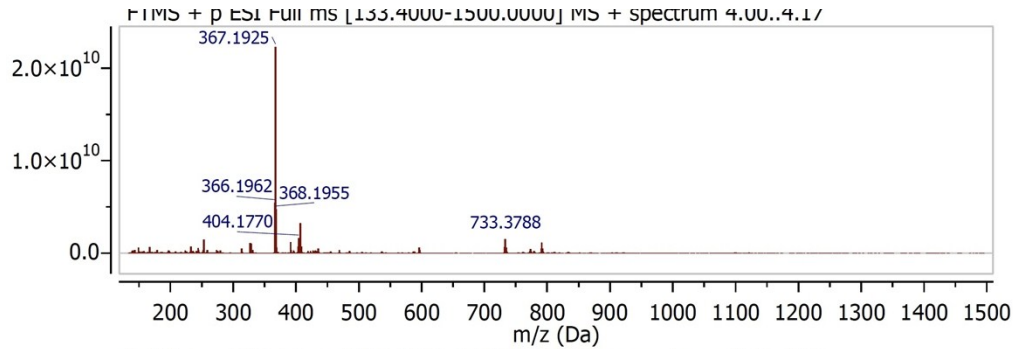

MS of peak at R.T. 3.99

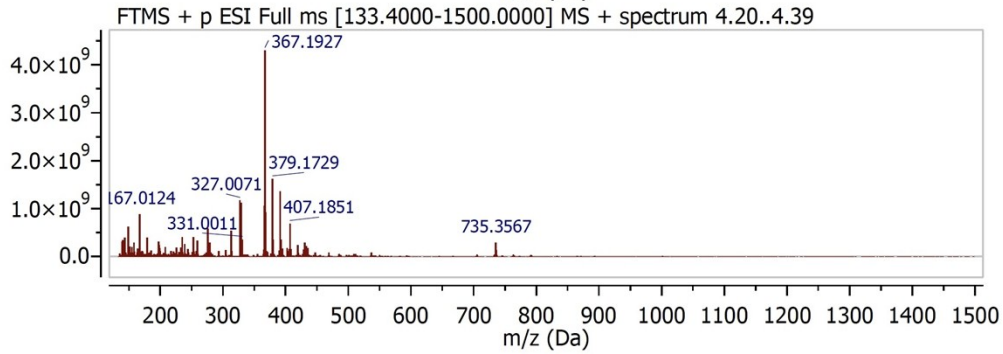

MS of peak at R.T. 4.17

NOTE: Compounds that elute at 3.99 min and 4.17 min are the same. The difference in retention times can be attributed to dimerization or trimerization of the parent boronic acid.

# <sup>1</sup>H NMR of Ixazomib

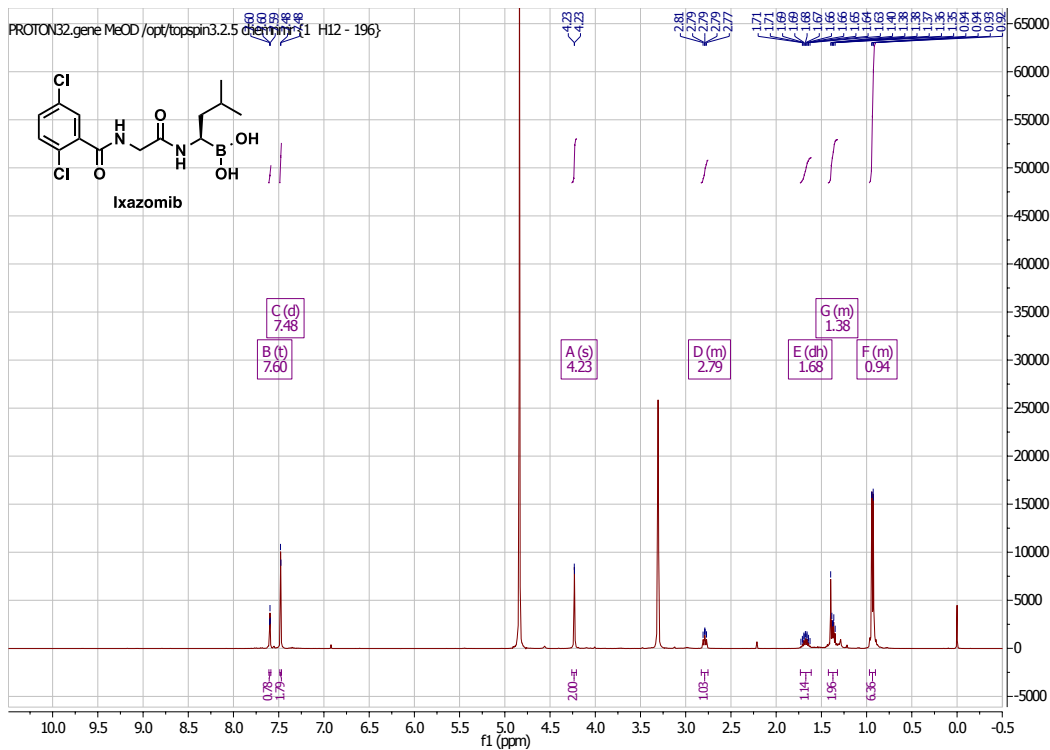

# HPLC trace of Ixazomib

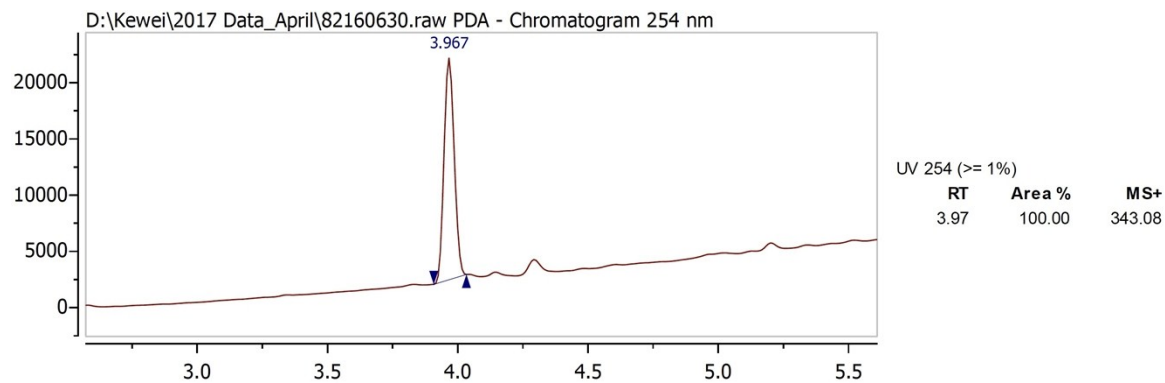

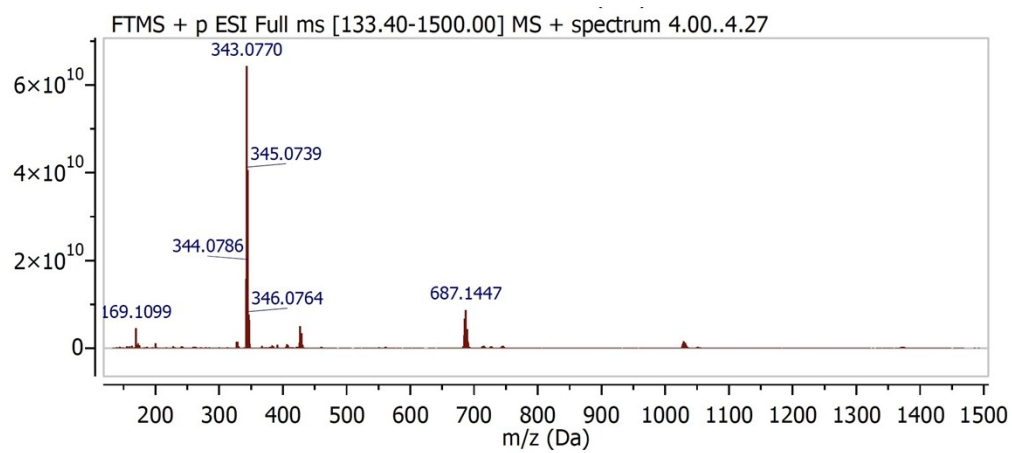

## References

1. For <sup>1</sup>H NMR of **Bortezomib** see: M. A. Beenen, C. An and J. A. Ellman, *J. Am. Chem. Soc.*, 2008, **130**, 6910–6911.
2. For <sup>1</sup>H NMR of **Ixazomib** see: C. Li, J. Wang, L. M. Barton, S. Yu, M. Tian, D. S. Peters, M. Kumar, A. W. Yu, K. A. Johnson, A. K. Chatterjee, M. Yan and P. S. Baran, *Science*, 2017, **356**(6342), eaam7355.
